# Supplementary material for: Synovial joint cavitation initiates with microcavities in interzone and is coupled to skeletal flexion and elongation in developing mouse embryo limbs
Source: Oxford University Press journal article supplement (doi:10.1242/bio.059381), 2022-05-24
Supplement: bio059381supp.pdf [file bio059381supp.pdf]

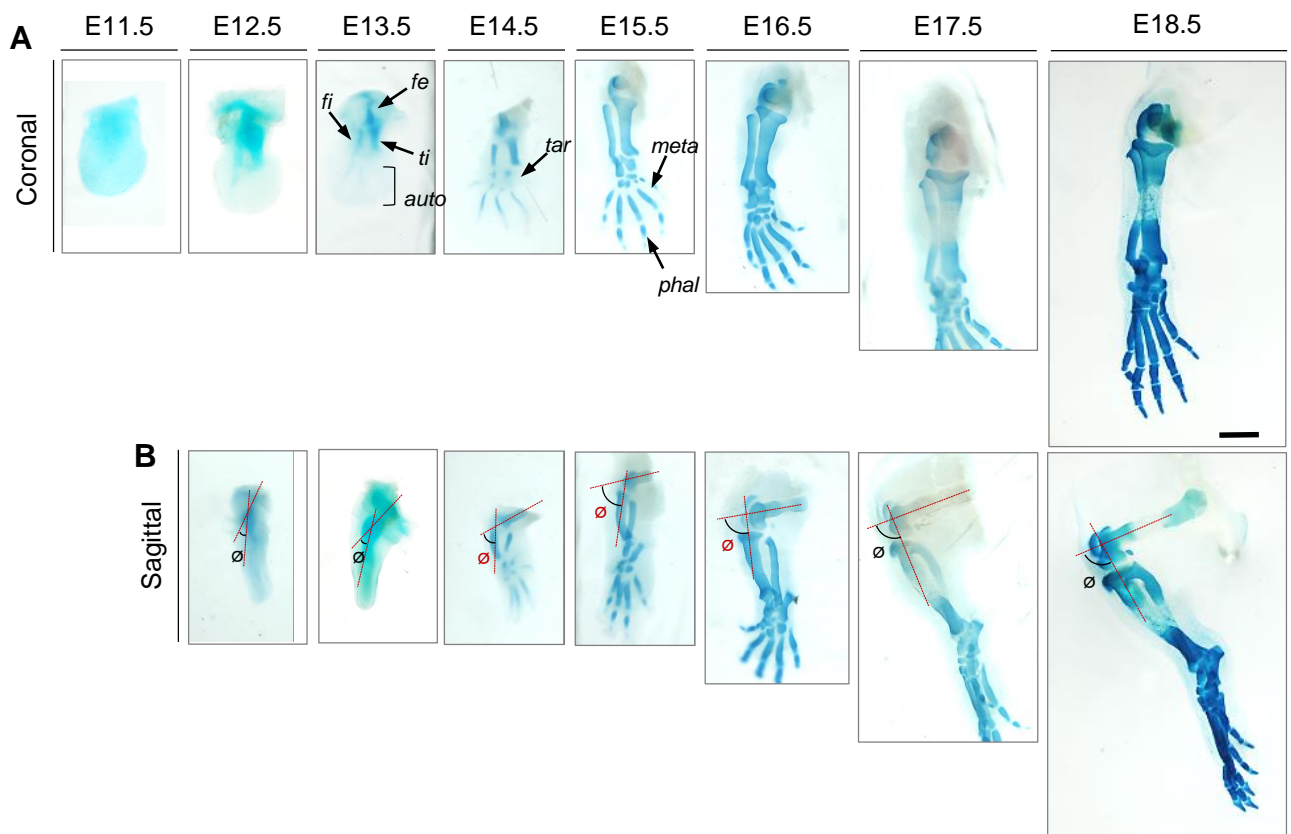

**Fig. S1.** Flexion angle ( $\varnothing$ ) and Skeletal growth
